# Supplementary material for: Do Children Carry the Weight of Divorce?
Source: Springer Nature journal article supplement (doi:10.1007/s13524-019-00784-4), 2019-06-01

## Online Appendix

**Table A1. Descriptive characteristics of the analytical sample**

|                                                | <b>Wave 2</b> | <b>Wave 3</b> | <b>Wave 4</b> | <b>Wave 5</b> |
|------------------------------------------------|---------------|---------------|---------------|---------------|
| Cohort member age in days (mean)               | 1139          | 1903          | 2637          | 4076          |
| <i>Min age in days</i>                         | 1023          | 1614          | 2326          | 3713          |
| <i>Max age in days</i>                         | 1631          | 2238          | 2941          | 4474          |
| Number of observations                         | 7,574         |               |               |               |
| <b>Family characteristics</b>                  |               |               |               |               |
| Top income quintile (%)                        | 10.6          | 10.6          | 11.7          | 9.6           |
| Bottom income quintile (%)                     | 23.7          | 23.7          | 24.0          | 24.4          |
| Number of biological and step-siblings (mean)  | 1.2           | 1.4           | 1.5           | 1.5           |
| Presence of a step-parent in the household (%) | 0.7           | 2.0           | 1.6           | 5.4           |
| Main respondent is depressed (%)               | 30.6          | 27.0          | 29.5          | 39.4          |
| Number of observations*                        | 7,052         |               |               |               |

\*Note: The number of observations drops because of some cases with missing values on the additional family covariates.

**Table A2. Fixed-effects regression model on BMI, BMI-z scores, and overweight on the unbalanced sample**

|                                                                   | <b>BMI</b>           |                      | <b>BMI z-scores</b>  |                      | <b>Overweight</b>    |                      |
|-------------------------------------------------------------------|----------------------|----------------------|----------------------|----------------------|----------------------|----------------------|
|                                                                   | <b>Model 1</b>       | <b>Model 2</b>       | <b>Model 1</b>       | <b>Model 2</b>       | <b>Model 1</b>       | <b>Model 1</b>       |
| Cohort member age in days                                         | -0.003***<br>(0.000) | -0.003***<br>(0.000) | -0.000***<br>(0.000) | -0.000***<br>(0.000) | -0.000***<br>(0.000) | -0.000***<br>(0.000) |
| Cohort member age in days <sup>2</sup>                            | 0.000***<br>(0.000)  | 0.000***<br>(0.000)  | 0.000***<br>(0.000)  | 0.000***<br>(0.000)  | 0.000***<br>(0.000)  | 0.000***<br>(0.000)  |
| Parents separated                                                 | 0.291***<br>(0.077)  |                      | 0.086***<br>(0.029)  |                      | 0.022<br>(0.014)     |                      |
| <i>Reference Category: At least 12 months prior to separation</i> |                      | (dropped)            |                      | (dropped)            |                      | (dropped)            |
| Pre-sep 0-12 months                                               |                      | 0.108<br>(0.088)     |                      | 0.044<br>(0.042)     |                      | -0.003<br>(0.020)    |
| Post-sep 0-11months                                               |                      | 0.205*<br>(0.114)    |                      | 0.057<br>(0.054)     |                      | 0.027<br>(0.017)     |
| Post-sep 12-23months                                              |                      | 0.264**<br>(0.111)   |                      | 0.094**<br>(0.047)   |                      | 0.005<br>(0.019)     |
| Post-sep 24-35months                                              |                      | 0.426***<br>(0.129)  |                      | 0.129***<br>(0.045)  |                      | 0.034<br>(0.023)     |
| Post-sep 36+months                                                |                      | 0.443***<br>(0.121)  |                      | 0.127***<br>(0.045)  |                      | 0.036*<br>(0.019)    |
| Constant                                                          | 19.010***            | 19.021***            | 0.837***             | 0.839***             | 0.320***             | 0.321***             |
| Number of observations                                            | 7,765                |                      | 7,765                |                      | 7,765                |                      |
| Number of groups                                                  | 31,018               |                      | 31,018               |                      | 31,018               |                      |

Note: Standard errors are provided in parenthesis \*\*\* p<0.01, \*\* p<0.05, \* p<0.1. Standard errors clustered at the primary sampling unit.

**Table A3. Fixed-effects regression model on BMI, BMI-z scores, and overweight with adjustment for time-varying family characteristics**

|                                                                   | BMI                  |                      | BMI z-scores         |                      | Overweight           |                      |
|-------------------------------------------------------------------|----------------------|----------------------|----------------------|----------------------|----------------------|----------------------|
|                                                                   | Model 1              | Model 2              | Model 1              | Model 2              | Model 1              | Model 1              |
| Cohort member age in days                                         | -0.003***<br>(0.000) | -0.003***<br>(0.000) | -0.000***<br>(0.000) | -0.000***<br>(0.000) | -0.000***<br>(0.000) | -0.000***<br>(0.000) |
| Cohort member age in days squared                                 | 0.000***<br>(0.000)  | 0.000***<br>(0.000)  | 0.000***<br>(0.000)  | 0.000***<br>(0.000)  | 0.000***<br>(0.000)  | 0.000***<br>(0.000)  |
| Parents separated                                                 | 0.264***<br>(0.085)  |                      | 0.070**<br>(0.032)   |                      | 0.020<br>(0.015)     |                      |
| <i>Reference Category: At least 12 months prior to separation</i> |                      |                      |                      |                      |                      |                      |
| Pre-sep 0-12 months                                               |                      | 0.090<br>(0.096)     |                      | 0.038<br>(0.045)     |                      | -0.003<br>(0.021)    |
| Post-sep 0-11 months                                              |                      | 0.150<br>(0.120)     |                      | 0.037<br>(0.058)     |                      | 0.024<br>(0.019)     |
| Post-sep 12-23 months                                             |                      | 0.214*<br>(0.125)    |                      | 0.069<br>(0.052)     |                      | -0.002<br>(0.020)    |
| Post-sep 24-35 months                                             |                      | 0.439***<br>(0.136)  |                      | 0.128***<br>(0.048)  |                      | 0.037<br>(0.025)     |
| Post-sep 36+ months                                               |                      | 0.444***<br>(0.137)  |                      | 0.115**<br>(0.050)   |                      | 0.039*<br>(0.021)    |
| Main respondent is depressed                                      | 0.112***<br>(0.038)  | 0.113***<br>(0.038)  | 0.026*<br>(0.016)    | 0.027*<br>(0.016)    | 0.007<br>(0.007)     | 0.008<br>(0.007)     |
| Bottom income quintile (reference top income quintile)            | -0.015<br>(0.097)    | 0.005<br>(0.098)     | -0.013<br>(0.034)    | -0.010<br>(0.034)    | 0.001<br>(0.016)     | 0.004<br>(0.017)     |
| Second income quintile                                            | 0.038<br>(0.073)     | 0.047<br>(0.073)     | 0.001<br>(0.029)     | 0.003<br>(0.029)     | -0.004<br>(0.013)    | -0.002<br>(0.013)    |
| Third income quintile                                             | 0.112*<br>(0.060)    | 0.117**<br>(0.060)   | 0.037<br>(0.023)     | 0.039*<br>(0.023)    | 0.011<br>(0.011)     | 0.012<br>(0.011)     |
| Fourth income quintile                                            | -0.010<br>(0.047)    | -0.008<br>(0.047)    | -0.002<br>(0.019)    | -0.002<br>(0.019)    | 0.015*<br>(0.008)    | 0.015*<br>(0.008)    |
| Number of siblings in the household                               | -0.264***<br>(0.040) | -0.263***<br>(0.040) | -0.082***<br>(0.015) | -0.082***<br>(0.015) | -0.015***<br>(0.006) | -0.015***<br>(0.006) |
| Presence of a step parent in the household                        | -0.074<br>(0.163)    | -0.152<br>(0.170)    | -0.011<br>(0.061)    | -0.028<br>(0.062)    | -0.007<br>(0.023)    | -0.016<br>(0.024)    |
| Constant                                                          | 19.132***<br>(0.086) | 19.141***<br>(0.085) | 0.884***<br>(0.039)  | 0.886***<br>(0.039)  | 0.325***<br>(0.016)  | 0.326***<br>(0.016)  |
| Number of observations                                            |                      | 28,208               |                      | 28,208               |                      | 28,208               |
| Number of groups                                                  |                      | 7,052                |                      | 7,052                |                      | 7,052                |

Note: Standard errors are provided in parenthesis \*\*\* p<0.01, \*\* p<0.05, \* p<0.1. Standard errors clustered at the primary sampling unit.

**Table A4. Fixed-effects regression model on BMI, BMI-z scores, and overweight for waves 3-5 only**

|                                                                      | BMI                  |                      |                      | BMI z-scores         |                      |                      | Overweight           |                      |                      |
|----------------------------------------------------------------------|----------------------|----------------------|----------------------|----------------------|----------------------|----------------------|----------------------|----------------------|----------------------|
|                                                                      | Model 1              | Model 2              | Model 3              | Model 1              | Model 2              | Model 3              | Model 1              | Model 2              | Model 3              |
| Cohort member age in days                                            | -0.003***<br>(0.000) | -0.003***<br>(0.000) | -0.002***<br>(0.000) | -0.001***<br>(0.000) | -0.001***<br>(0.000) | -0.001***<br>(0.000) | -0.000***<br>(0.000) | -0.000***<br>(0.000) | -0.000***<br>(0.000) |
| Cohort member age in days squared                                    | 0.000***<br>(0.000)  | 0.000***<br>(0.000)  | 0.000***<br>(0.000)  | 0.000***<br>(0.000)  | 0.000***<br>(0.000)  | 0.000***<br>(0.000)  | 0.000***<br>(0.000)  | 0.000***<br>(0.000)  | 0.000***<br>(0.000)  |
| Parents separated                                                    | 0.363***<br>(0.099)  |                      |                      | 0.114***<br>(0.038)  |                      |                      | 0.026<br>(0.017)     |                      |                      |
| <i>Reference Category: At least 12 months prior to separationpre</i> |                      | (dropped)            | (dropped)            |                      | (dropped)            | (dropped)            |                      | (dropped)            | (dropped)            |
| Pre-sep 0-12 months                                                  |                      | 0.202<br>(0.140)     | 0.166<br>(0.137)     |                      | 0.078<br>(0.056)     | 0.067<br>(0.056)     |                      | -0.004<br>(0.023)    | -0.009<br>(0.023)    |
| Post-sep 0-11months                                                  |                      | 0.156<br>(0.153)     | 0.108<br>(0.156)     |                      | 0.062<br>(0.075)     | 0.046<br>(0.077)     |                      | 0.019<br>(0.024)     | 0.014<br>(0.024)     |
| Post-sep 12-23months                                                 |                      | 0.391***<br>(0.144)  | 0.351**<br>(0.149)   |                      | 0.160**<br>(0.063)   | 0.146**<br>(0.067)   |                      | 0.021<br>(0.024)     | 0.016<br>(0.023)     |
| Post-sep 24-35months                                                 |                      | 0.496***<br>(0.164)  | 0.476***<br>(0.162)  |                      | 0.146***<br>(0.051)  | 0.137***<br>(0.052)  |                      | 0.020<br>(0.026)     | 0.015<br>(0.026)     |
| Post-sep 36+months                                                   |                      | 0.613***<br>(0.165)  | 0.598***<br>(0.169)  |                      | 0.188***<br>(0.062)  | 0.180***<br>(0.064)  |                      | 0.047*<br>(0.025)    | 0.040<br>(0.025)     |
| Regular breakfast (no/yes)                                           |                      |                      | 0.060<br>(0.079)     |                      |                      | -0.004<br>(0.031)    |                      |                      | -0.019<br>(0.012)    |
| Eat fruit daily (no/yes)                                             |                      |                      | 0.159***<br>(0.047)  |                      |                      | 0.058***<br>(0.018)  |                      |                      | 0.026***<br>(0.007)  |
| TV more than 3hrs/day (no/yes)                                       |                      |                      | 0.150**<br>(0.064)   |                      |                      | 0.054**<br>(0.023)   |                      |                      | 0.021**<br>(0.009)   |
| Regular active play (no/yes)                                         |                      |                      | 0.019<br>(0.046)     |                      |                      | -0.012<br>(0.019)    |                      |                      | -0.011<br>(0.008)    |
| Regular bedtime (no/yes)                                             |                      |                      | 0.033<br>(0.080)     |                      |                      | 0.043<br>(0.027)     |                      |                      | -0.007<br>(0.011)    |
| Main respondent depressed (no/yes)                                   |                      |                      | 0.121**<br>(0.047)   |                      |                      | 0.014<br>(0.019)     |                      |                      | -0.001<br>(0.008)    |
| Bottom income quintile (ref: top quintile)                           |                      |                      | -0.026<br>(0.095)    |                      |                      | -0.017<br>(0.034)    |                      |                      | -0.005<br>(0.017)    |
| Second income quintile                                               |                      |                      | 0.045<br>(0.069)     |                      |                      | 0.007<br>(0.027)     |                      |                      | -0.014<br>(0.013)    |
| Third income quintile                                                |                      |                      | 0.116**<br>(0.056)   |                      |                      | 0.037*<br>(0.021)    |                      |                      | 0.001<br>(0.011)     |
| Fourth income quintile                                               |                      |                      | 0.015<br>(0.045)     |                      |                      | 0.011<br>(0.017)     |                      |                      | 0.012<br>(0.008)     |
| Number of siblings in the household                                  |                      |                      | -0.271***<br>(0.051) |                      |                      | -0.079***<br>(0.017) |                      |                      | -0.017**<br>(0.008)  |
| Presence of a step-parent in the household                           |                      |                      | -0.130<br>(0.184)    |                      |                      | -0.038<br>(0.069)    |                      |                      | -0.006<br>(0.025)    |
| Constant                                                             | 18.727***            | 18.756***            | 18.736***            | 1.153***             | 1.162***             | 1.184***             | 0.349***             | 0.351***             | 0.376***             |
| Number of observations                                               |                      | 21,075               |                      |                      | 21,075               |                      |                      | 21,075               |                      |
| Number of groups                                                     |                      | 7,052                |                      |                      | 7,052                |                      |                      | 7,052                |                      |

Note: Standard errors are provided in parenthesis \*\*\* p<0.01, \*\* p<0.05, \* p<0.1. Standard errors clustered at the primary sampling unit.

**Table A5. Fixed-effects regression model on the control variables for waves 3-5**

|                                                                   | CM has breakfast every day |                      | CM eats fruit daily  |                      | CM watches TV 3+ hours every day |                    | CM does regular active playing |                      | CM has no regular bedtime |                   | Main respondent depressed |                     | Family in the bottom income quintile |                     | Presence of a step-parent in the hh |                      |
|-------------------------------------------------------------------|----------------------------|----------------------|----------------------|----------------------|----------------------------------|--------------------|--------------------------------|----------------------|---------------------------|-------------------|---------------------------|---------------------|--------------------------------------|---------------------|-------------------------------------|----------------------|
|                                                                   | Model 1                    | Model 2              | Model 1              | Model 2              | Model 1                          | Model 2            | Model 1                        | Model 2              | Model 1                   | Model 2           | Model 1                   | Model 2             | Model 1                              | Model 2             | Model 1                             | Model 2              |
| Child age in days                                                 | 0.000***<br>(0.000)        | 0.000***<br>(0.000)  | 0.000***<br>(0.000)  | 0.000***<br>(0.000)  | 0.000<br>(0.000)                 | 0.000<br>(0.000)   | 0.000<br>(0.000)               | 0.000<br>(0.000)     | -0.000<br>(0.000)         | -0.000<br>(0.000) | -0.000<br>(0.000)         | -0.000<br>(0.000)   | 0.000*<br>(0.000)                    | 0.000**<br>(0.000)  | -0.000***<br>(0.000)                | -0.000***<br>(0.000) |
| Child age in days squared                                         | -0.000***<br>(0.000)       | -0.000***<br>(0.000) | -0.000***<br>(0.000) | -0.000***<br>(0.000) | -0.000<br>(0.000)                | -0.000<br>(0.000)  | -0.000***<br>(0.000)           | -0.000***<br>(0.000) | 0.000<br>(0.000)          | 0.000<br>(0.000)  | 0.000***<br>(0.000)       | 0.000***<br>(0.000) | -0.000**<br>(0.000)                  | -0.000**<br>(0.000) | 0.000***<br>(0.000)                 | 0.000***<br>(0.000)  |
| Parents separated                                                 | -0.031*<br>(0.018)         |                      | 0.074***<br>(0.026)  |                      | -0.009<br>(0.017)                |                    | -0.222***<br>(0.023)           |                      | -0.007<br>(0.015)         |                   | 0.059**<br>(0.025)        |                     | 0.084***<br>(0.017)                  |                     | 0.133***<br>(0.013)                 |                      |
| <i>Reference Category: At least 12 months prior to separation</i> |                            | (dropped)            |                      | (dropped)            |                                  | (dropped)          |                                | (dropped)            |                           | (dropped)         |                           | (dropped)           |                                      | (dropped)           |                                     | (dropped)            |
| Pre-sep 0-12 months                                               |                            |                      |                      |                      |                                  |                    |                                |                      |                           |                   |                           |                     |                                      |                     |                                     |                      |
|                                                                   |                            | -0.018<br>(0.022)    |                      | 0.106***<br>(0.035)  |                                  | -0.013<br>(0.030)  |                                | -0.017<br>(0.036)    |                           | 0.002<br>(0.021)  |                           | 0.082*<br>(0.042)   |                                      | -0.032<br>(0.024)   |                                     | 0.027<br>(0.017)     |
| Post-sep 0-11 months                                              |                            |                      |                      | 0.060<br>(0.037)     |                                  | 0.016<br>(0.029)   |                                | -0.233***<br>(0.037) |                           | 0.010<br>(0.023)  |                           | 0.133***<br>(0.040) |                                      | 0.119***<br>(0.026) |                                     | 0.032**<br>(0.014)   |
| Post-sep 12-23 months                                             |                            |                      |                      | 0.114***<br>(0.041)  |                                  | -0.017<br>(0.028)  |                                | -0.217***<br>(0.033) |                           | 0.014<br>(0.021)  |                           | 0.082**<br>(0.036)  |                                      | 0.123***<br>(0.028) |                                     | 0.114***<br>(0.024)  |
| Post-sep 24-35 months                                             |                            |                      |                      | 0.045<br>(0.041)     |                                  | 0.008<br>(0.024)   |                                | -0.259***<br>(0.037) |                           | -0.026<br>(0.023) |                           | 0.049<br>(0.038)    |                                      | 0.071***<br>(0.027) |                                     | 0.137***<br>(0.025)  |
| Post-sep 36+ months                                               |                            |                      |                      | 0.178***<br>(0.034)  |                                  | -0.044*<br>(0.023) |                                | -0.236***<br>(0.030) |                           | -0.033<br>(0.020) |                           | 0.069*<br>(0.037)   |                                      | -0.012<br>(0.023)   |                                     | 0.255***<br>(0.021)  |
| Number of observations                                            | 21,075                     |                      | 21,075               |                      | 21,075                           |                    | 21,075                         |                      | 21,075                    |                   | 21,075                    |                     | 21,075                               |                     | 21,075                              |                      |
| Number of groups                                                  | 7,052                      |                      | 7,052                |                      | 7,052                            |                    | 7,052                          |                      | 7,052                     |                   | 7,052                     |                     | 7,052                                |                     | 7,052                               |                      |

Note: Standard errors are provided in parenthesis \*\*\* p<0.01, \*\* p<0.05, \* p<0.1. Standard errors clustered at the primary sampling unit.

**Figure A1. Evolution of BMI distribution over age, by sex**

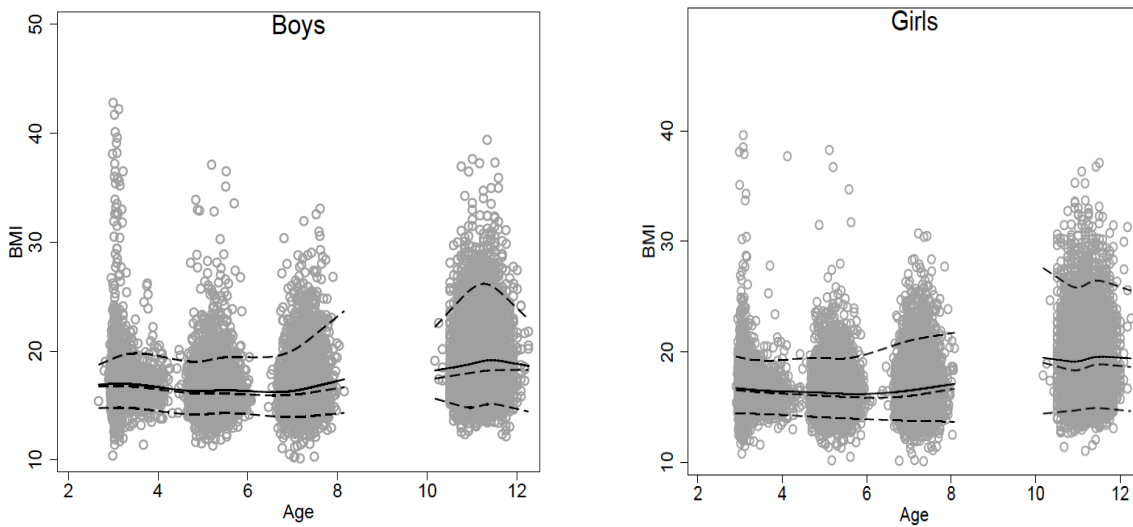

Note: Data from all children with BMI measurements in any Millennium Cohort Study (MCS) wave (full MCS sample). The four clouds of points on each figure correspond to the four MCS waves 2-5. Age is measured in days, since the day of birth divided by 365. Average BMI is indicated by the solid line. Estimates of the 5<sup>th</sup>, 50<sup>th</sup>, and 95<sup>th</sup> percentiles of the BMI distribution are shown by the dashed lines.

**Figure A2. Evolution of BMI z-scores over age, by sex**

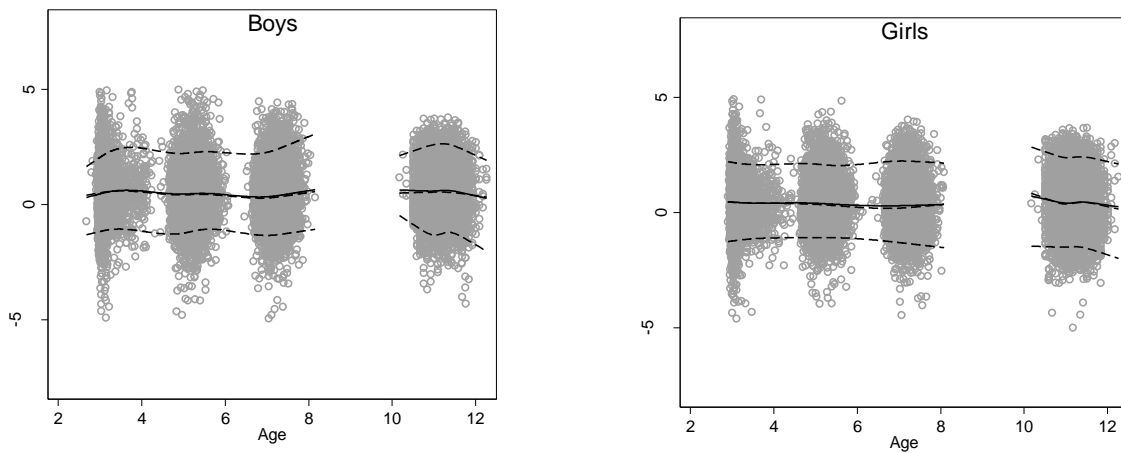

**Figure A3. Predicted values of BMI for the time to/from separation excluding multiple separations**

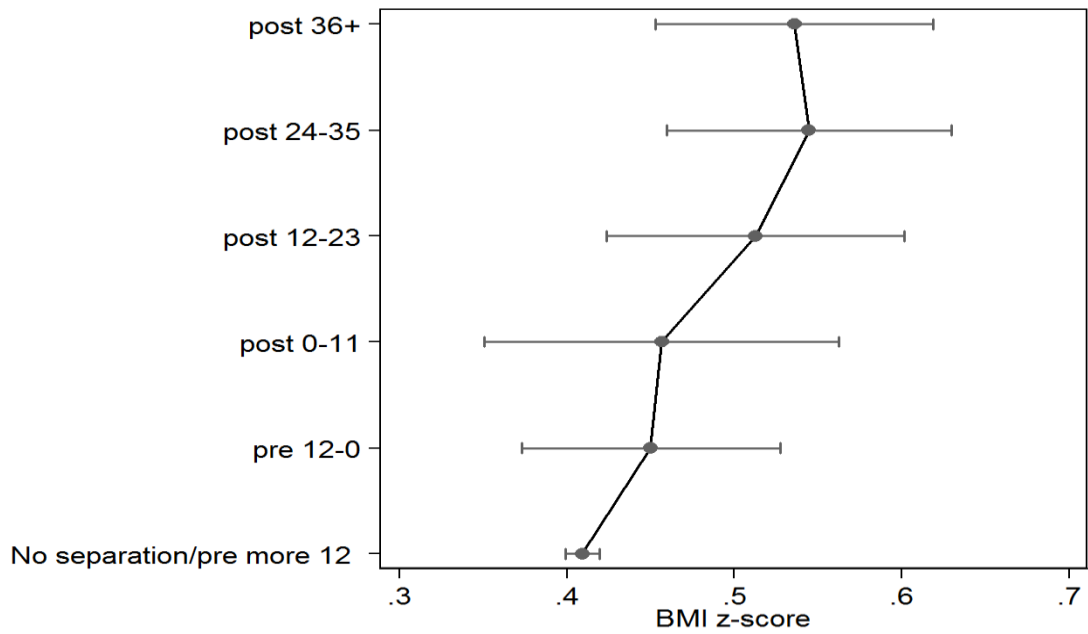

**Figure A4. Predicted values of BMI for the time to/from separation excluding multiple separations**

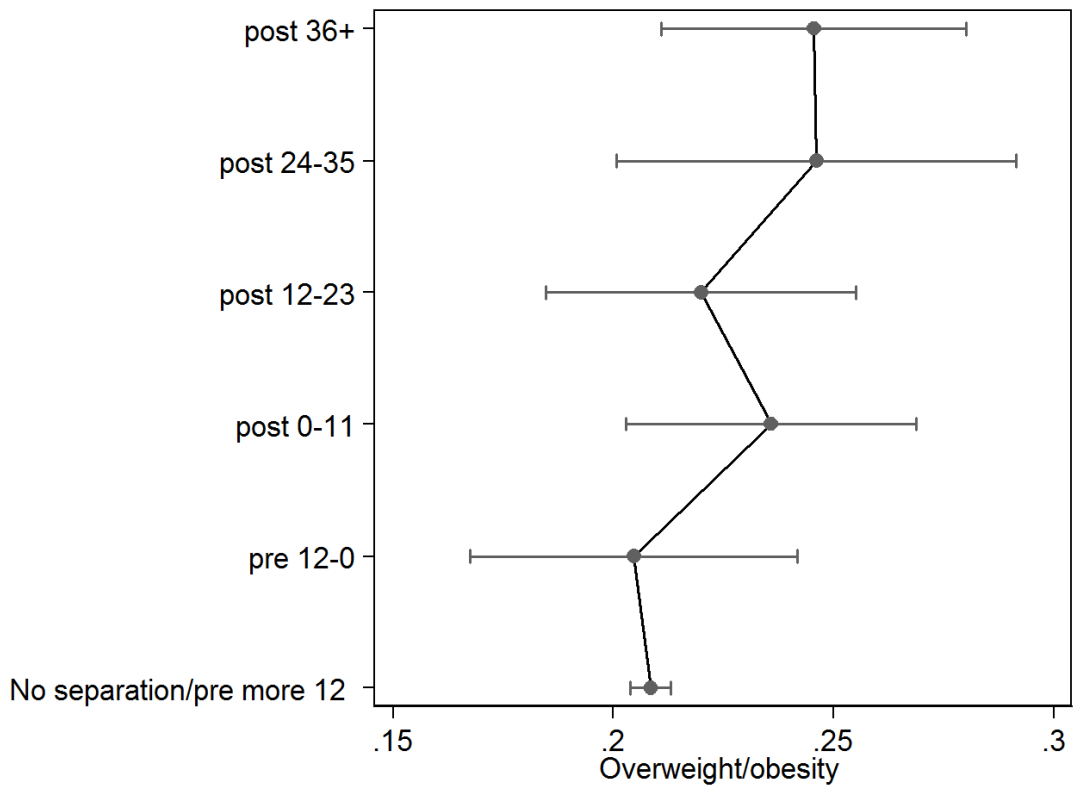

**Figure A5. Predicted values of overweight for the time to/from separation excluding multiple separations**

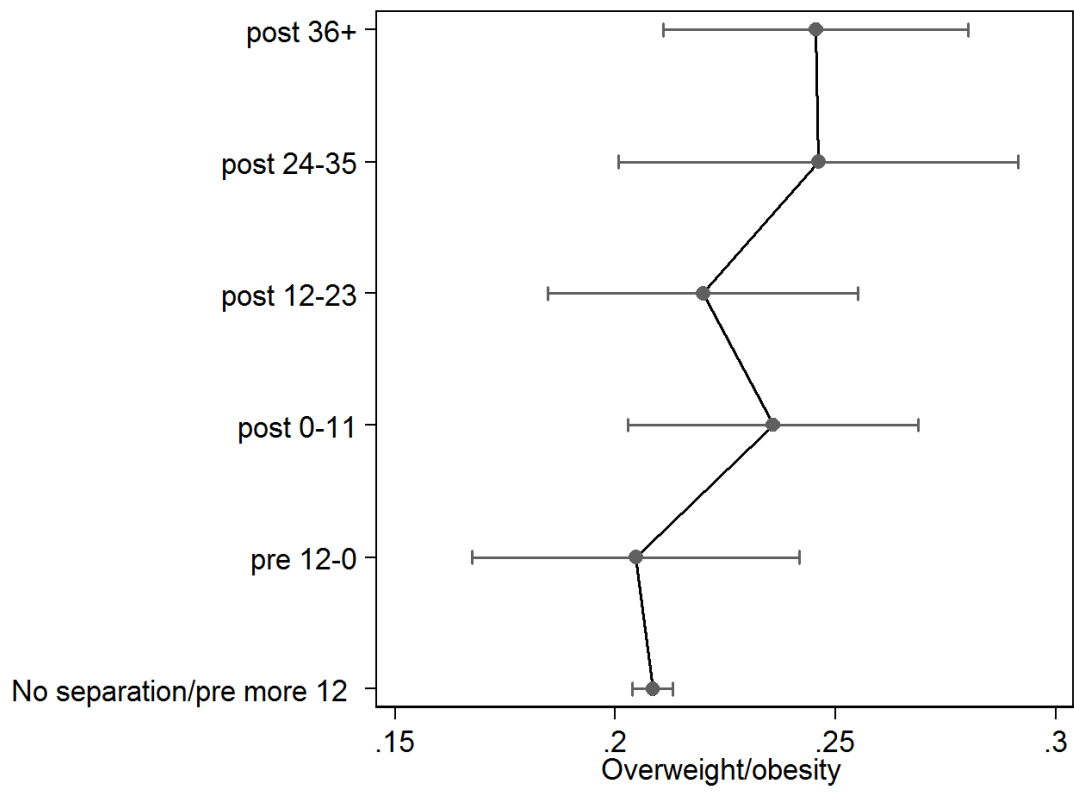

Supplement: MOESM1 [file 16799120]
